# Supplementary material
Source: MDPI journal article supplement (https://www.mdpi.com/2076-3417/10/1/336)
Supplement: s1 [file s1]

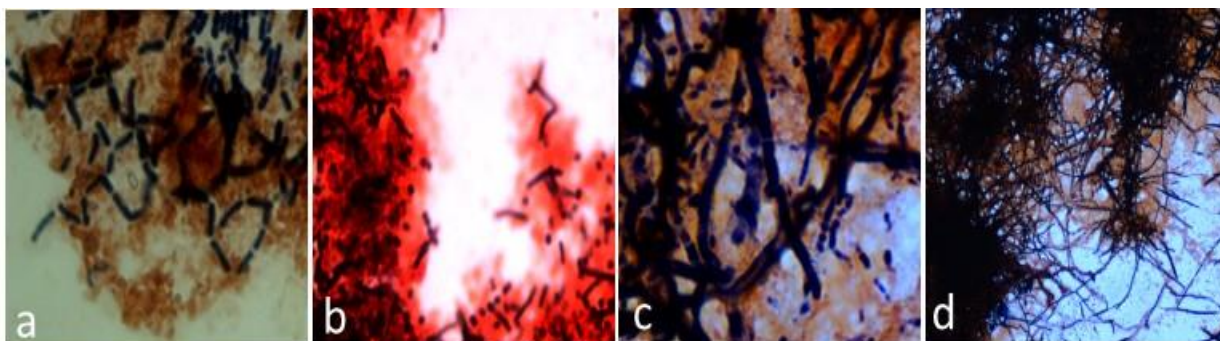

**Figure S1** Light microscope images of encapsulated *R. zopfii* culture morphologies in activated SBP microfiltration capsules over time (14 days) in MSM+2% LB growth medium. *R. zopfii* growth exhibited Gram-positive stain filaments together with cocci-shaped cells. (a) 7 days ( $\times 1000$ ), (b) 11 days ( $\times 1000$ ), (c) 14 days ( $\times 1000$ ), (d) 14 days ( $\times 100$ ). Encapsulated *R. zopfii* showed progressive fragmentation at the edge of the colony 7 days after the capsules' activation. Fourteen days after activation, the colony presented large (over 1000  $\mu\text{m}$ ) and dense filaments (like a floc particle structure) containing some extracellular polymer substances (EPS). Fragmentation into coccoid elements was also observed at this stage
